# Supplementary material
Source: publisher figshare collection journal article supplement (https://sage.figshare.com/ndownloader/files/16118096)

Online Figure S1 - CONSORT 2010 Flow Diagram

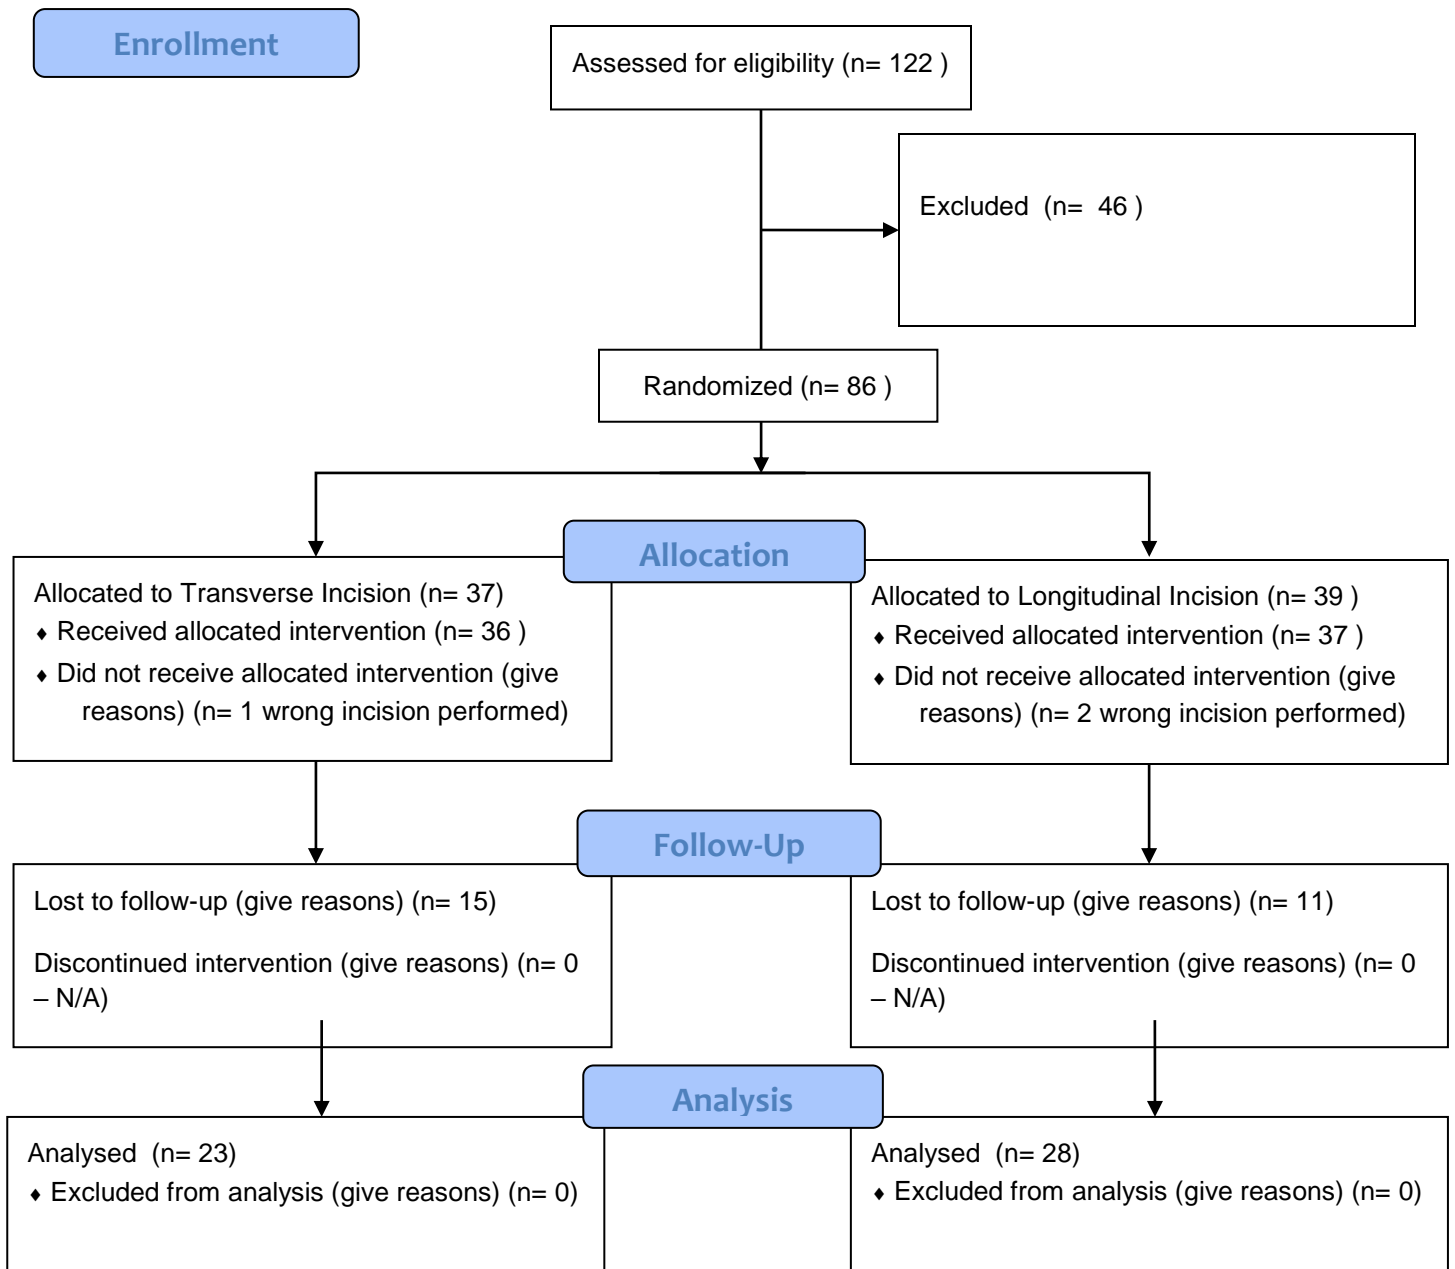

Supplement: Supplementary file 1 [file 16118096]
